# Supplementary material
Source: ML conference proceedings conference paper supplement (https://openreview.net/forum?id=jrFJWpDZvq)

# GO\_Biological\_Process\_2021

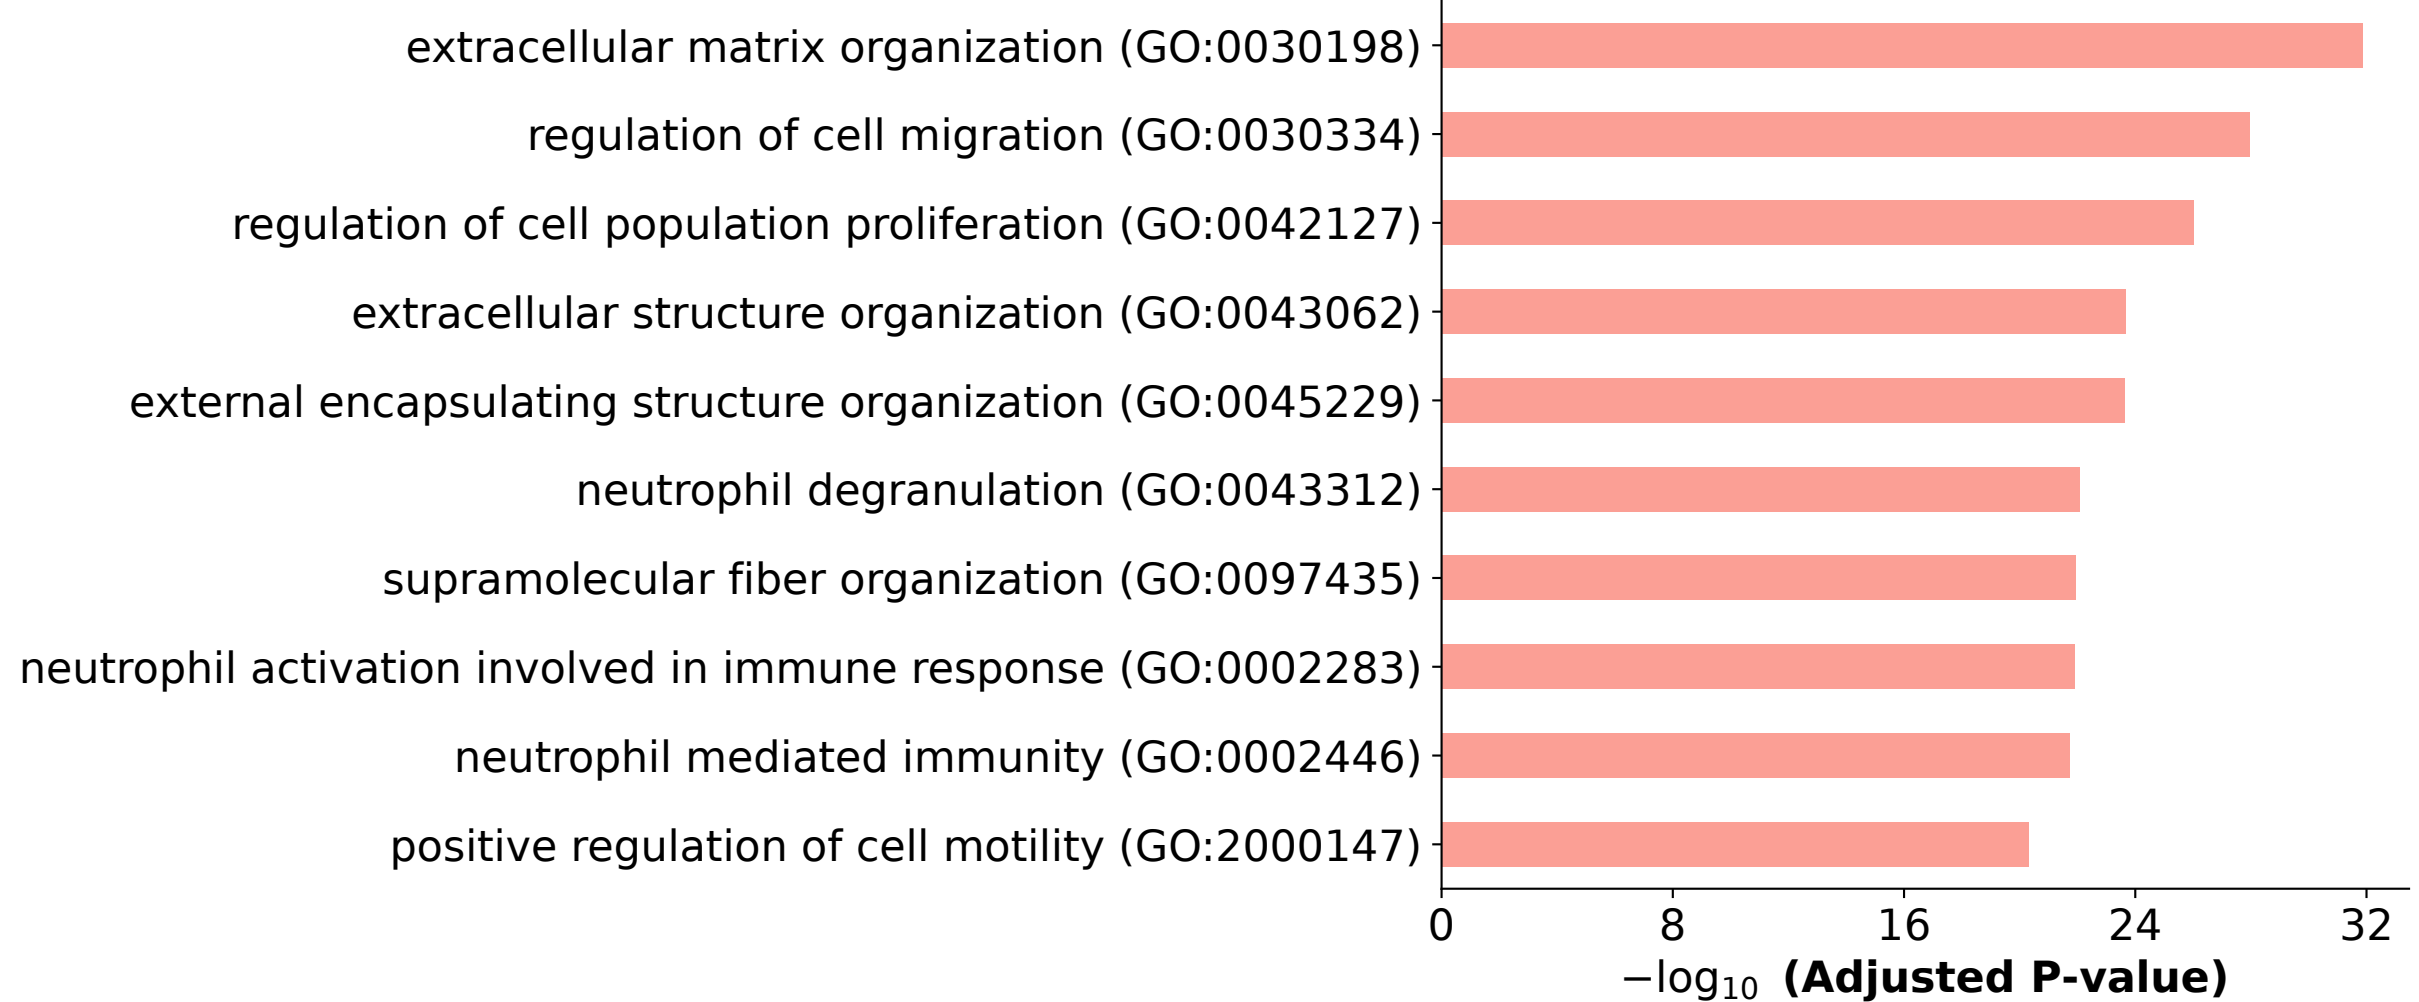

Supplement: supplementary_material [file GO_Biological_Process_2021.Human.enrichr.reports.pdf › 代码/enrichr_go_biological_process/GO_Biological_Process_2021.Human.enrichr.reports.pdf]

# KEGG\_2021\_Human

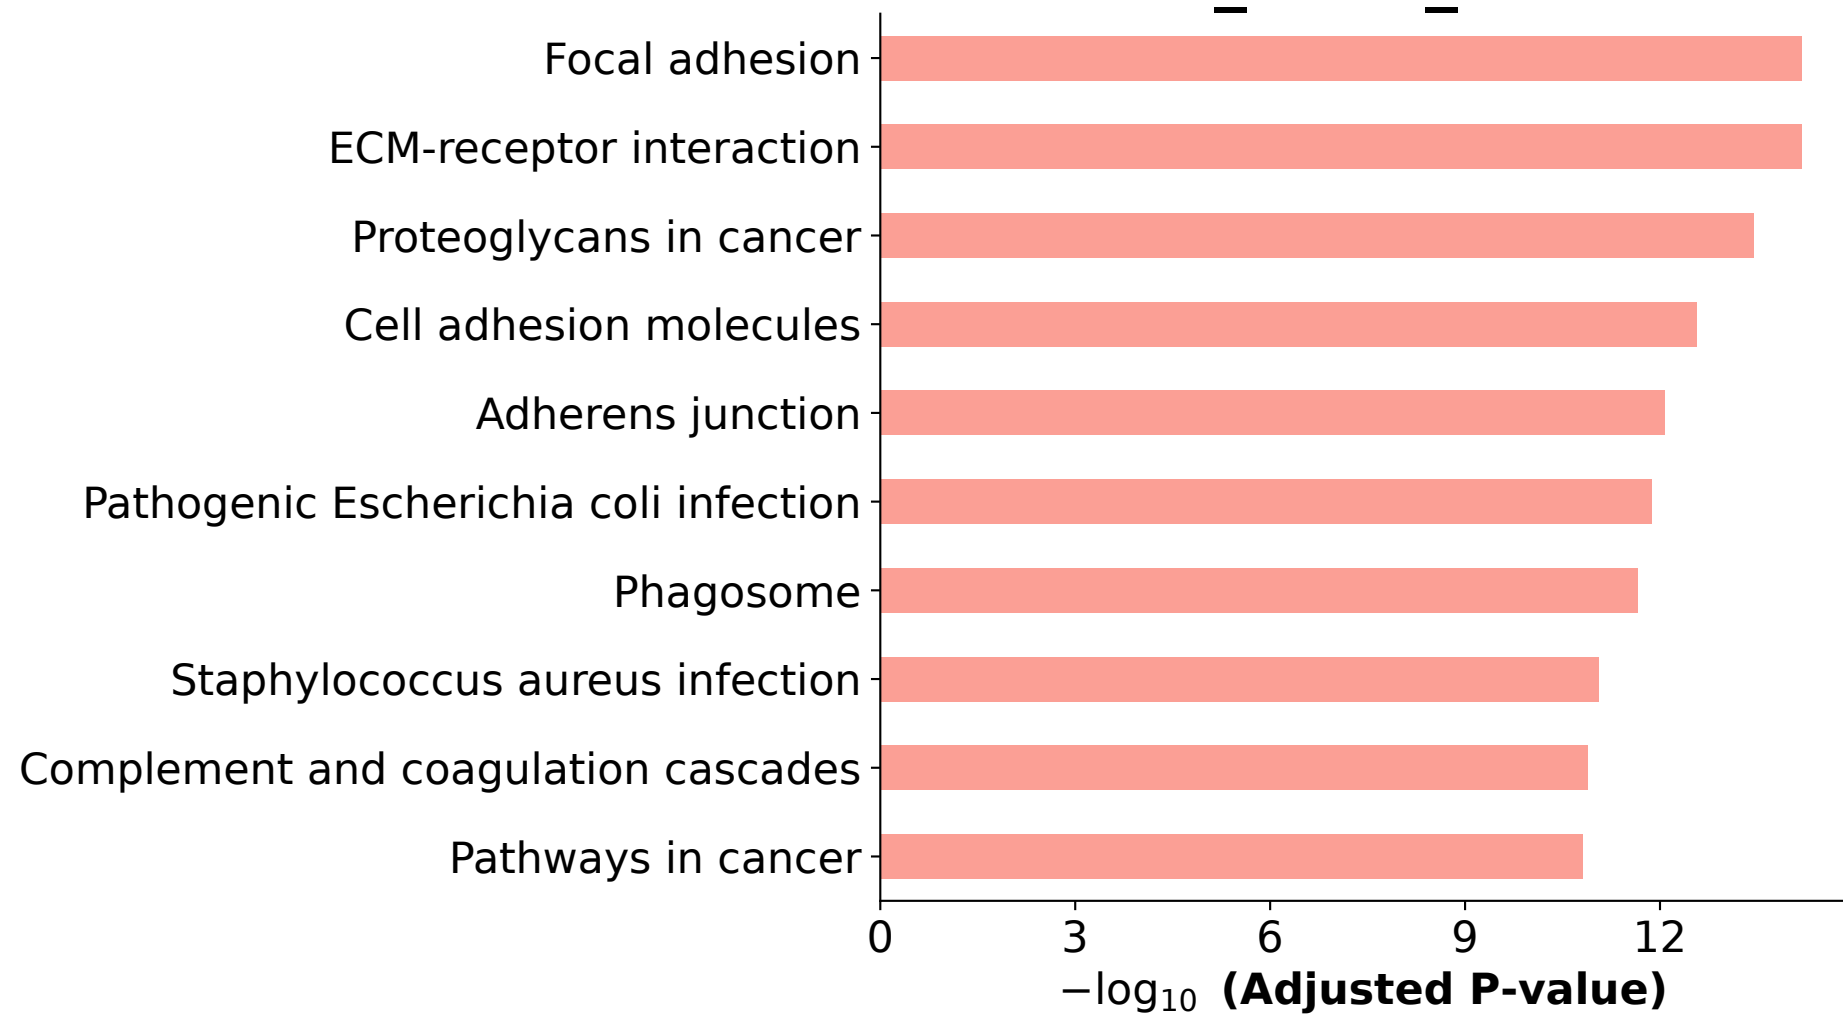

Supplement: supplementary_material [file KEGG_2021_Human.Human.enrichr.reports.pdf › 代码/enrichr_kegg/KEGG_2021_Human.Human.enrichr.reports.pdf]
